# Supplementary material for: Raman spectroscopy studies of apatite-type germanate oxide ion conductors: correlation with interstitial oxide ion location and conduction
Source: Royal Society of Chemistry journal article supplement (doi:10.1039/b922834a), 2010-01-01
Supplement: b922834a.pdf [file b922834a.pdf]

Supplementary Information

Table 1. Interatomic potentials employed in the modelling studies.

| <b>buckingham</b> | <b>A[eV]</b> | <b>C [eV Å<sup>6</sup>]</b> | <b>r [Å]</b> | <b>Y</b> | <b>K [eV Å<sup>-2</sup>]</b> |
|-------------------|--------------|-----------------------------|--------------|----------|------------------------------|
| Ge core O shell   | 1497.3996    | 0.325646                    | 16.00        | 4.00     |                              |
| La core O shell   | 4579.23      | 0.30437                     | 0.00         | 3.00     |                              |
| Ba core O shell   | 931.7        | 0.39                        | 0            | 2        |                              |
| O shell O shell   | 22764.0      | 0.1490                      | 27.879       | -2.9     | 74.92                        |

Table 2. Comparison of observed and calculated lattice parameters for La<sub>8</sub>Ba<sub>2</sub>Ge<sub>6</sub>O<sub>26</sub> and La<sub>9</sub>BaGe<sub>6</sub>O<sub>26.5</sub>.

| Cell Parameters | La <sub>8</sub> Ba <sub>2</sub> Ge <sub>6</sub> O <sub>26</sub> |                   |                       | La <sub>9</sub> BaGe <sub>6</sub> O <sub>26.5</sub> |                   |                       |
|-----------------|-----------------------------------------------------------------|-------------------|-----------------------|-----------------------------------------------------|-------------------|-----------------------|
|                 | <i>Experimental</i>                                             | <i>Calculated</i> | <i>Difference [%]</i> | <i>Experimental</i>                                 | <i>Calculated</i> | <i>Difference [%]</i> |
| a               | 9.9828                                                          | 10.0906           | 1.0800                | 9.9303                                              | 9.9014            | -0.2910               |
| b               | 9.9828                                                          | 10.0906           | 1.0800                | 9.9303                                              | 10.0326           | 1.0302                |
| c               | 7.4046                                                          | 7.2564            | -2.0000               | 7.3615                                              | 7.1764            | -2.5144               |
| alpha           | 90.0000                                                         | 90.0000           |                       | 90.0000                                             | 91.73             | 1.9222                |
| beta            | 90.0000                                                         | 90.0000           |                       | 90.0000                                             | 88.76             | -1.3778               |
| gamma           | 120.0000                                                        | 120.0000          |                       | 120.0000                                            | 119.15            | -0.7083               |
| Vol.            | 639.0531                                                        | 639.8603          | 0.1300                | 628.685                                             | 622.29            | 1.0172                |
| Lattice Energy  |                                                                 | -1317.30          |                       |                                                     | -1347.46          |                       |

Table 3. Calculated and experimentally observed Raman active frequencies for the stoichiometric composition  $\text{La}_8\text{Ba}_2(\text{GeO}_4)_6\text{O}_2$ . For  $\text{La}_9\text{Ba}(\text{GeO}_4)_6\text{O}_{2.5}$ , the modelling predicts an extra mode in the gap region between bending and stretching modes at  $675\text{cm}^{-1}$  (experimentally observed at  $645\text{cm}^{-1}$ )

|                                      | <b>Lattice and Bending internal modes</b>                                                                                                                                           | <b>Stretching internal modes</b>                      |
|--------------------------------------|-------------------------------------------------------------------------------------------------------------------------------------------------------------------------------------|-------------------------------------------------------|
| v observed<br>[ $\text{cm}^{-1}$ ]   | 77, 83, 91, 99, 140, 160, 169, 207, 241, 261,<br>339, 386, 421, 476                                                                                                                 | 707, 724, 766, 775                                    |
| v calculated<br>[ $\text{cm}^{-1}$ ] | 43.6, 94.3, 101.5, 112.7, 119.9, 155, 160,<br>161.6, 184.6, 187.2, 193.4, 203.7, 218.3,<br>236, 246.2, 276.4, 302.7, 360.4, 363.4,<br>375.7, 451.1, 495.7, 499.4, 510.2, 520.1, 545 | 758.8, 763.6, 771.8,<br>792.9, 806.8, 812.5,<br>842.2 |
